# Supplementary material for: WGA is a probe for migrasomes
Source: PubMed Central journal article supplement (PMC6389894; doi:10.1038/s41421-018-0078-2), 2019-02-26
Supplement: 41421_2018_78_MOESM1_ESM.pdf [file 41421_2018_78_MOESM1_ESM.pdf]

## Supplementary materials

Figure S1

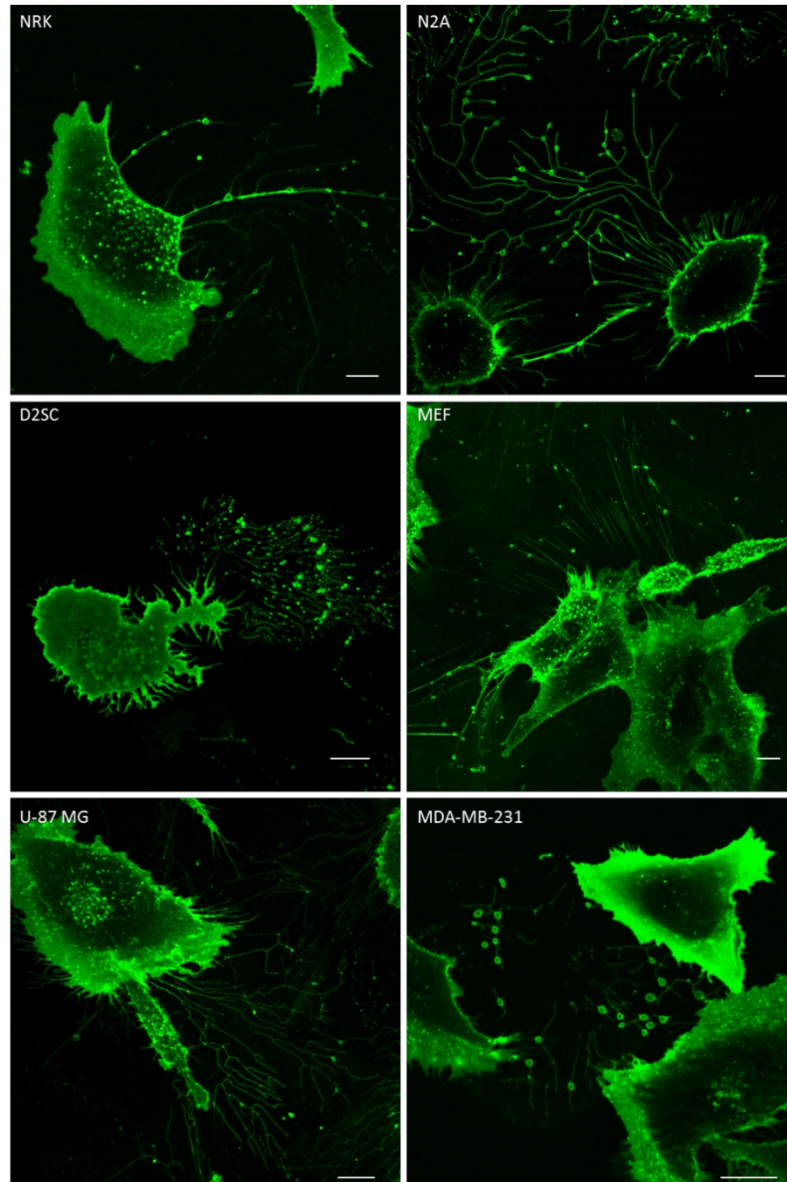

Figure S1. NRK, N2A, MEF, D2SC, U-87 MG and MDA-MB-231 cells were stained with 1  $\mu\text{g/ml}$  WGA-tetramethylrhodamine. Cells were observed by confocal microscopy. Scale bar, 10  $\mu\text{m}$ .

Figure S2

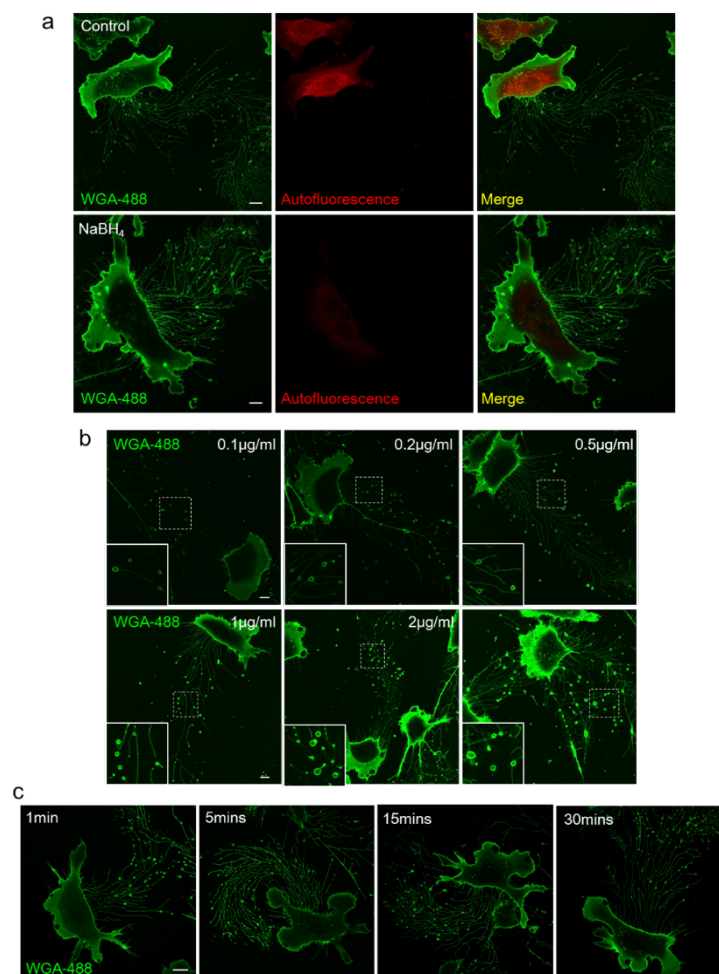

Figure S2. (a) L929 cells were fixed with 2.5% glutaraldehyde for 10 mins and stained with 1 µg/ml WGA-Alexa 488 for 10 mins, then treated with or without 1 mg/ml sodium borohydride for 7 mins. Cells were observed by confocal microscopy. Scale bar, 10 µm. (b) L929 cells were fixed with 2.5% glutaraldehyde, then stained with 0.1 µg/ml, 0.2 µg/ml, 0.5 µg/ml, 1 µg/ml, 2 µg/ml or 5 µg/ml WGA-Alexa 488 for 10 mins. Cells were observed by confocal microscopy. Scale bar, 10 µm. (c) L929 cells were fixed with 2.5% glutaraldehyde and then stained with WGA-Alexa 488 for 1 min, 5 mins, 15 mins, and 30 mins. Cells were observed by confocal microscopy. Scale bar, 10 µm.

Figure S3

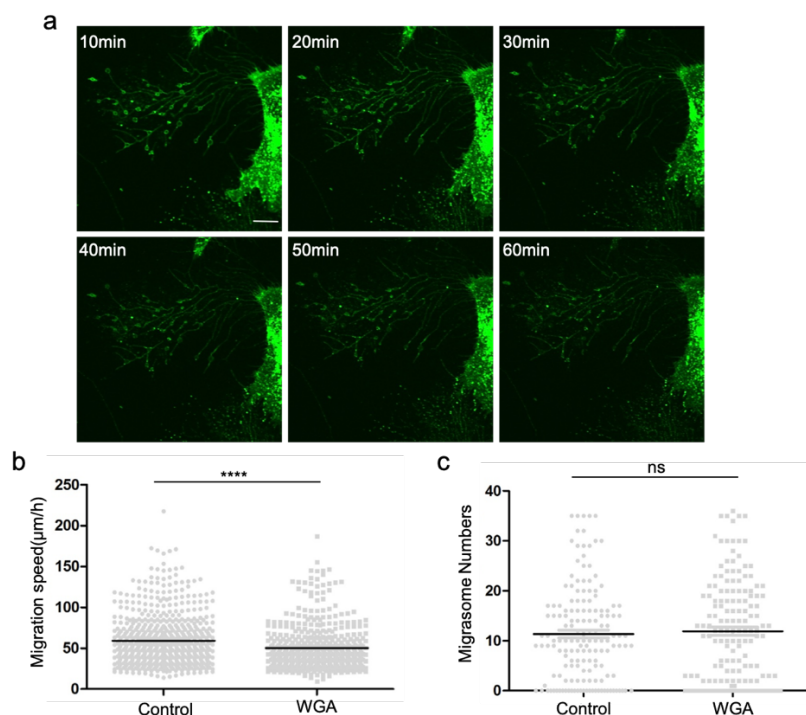

Figure S3. (a) L929 cells were stained with 1  $\mu\text{g/ml}$  WGA-Alexa 488 for 5 mins, then the WGA-Alexa 488-containing medium was removed and the cells were washed with PBS to further remove WGA-Alexa 488. Images were captured every 10 mins for 60 mins. (b) L929 cells stably expressing luciferase-GFP were imaged every 10 mins for 6 hs with or without WGA-Alexa 488 (1  $\mu\text{g/ml}$ ), and the migration track length of the cells was measured using ImageJ. The migration speed was then calculated.  $n=500$  cells from three independent experiments,  $t$  test  $P<0.0001$ , Error bars indicate  $\text{mean}\pm\text{SD}$ . (c) L929 cells were cultured for 7 hs with or without WGA-tetramethylrhodamine, then fixed with 2.5% glutaraldehyde and stained with 1  $\mu\text{g/ml}$  WGA-Alexa 488. The number of migrasomes per cell was determined.  $n=150$  cells from three independent experiments,  $t$  test  $P=0.6165$ , Error bars indicate  $\text{mean}\pm\text{SD}$ . Scale bar, 10  $\mu\text{m}$ .

## **Materials and Methods**

### **Reagents**

WGA (W7024) was purchased from Invitrogen. Fibronectin (PHE0023) was purchased from Gibco. Vigofect (T001) was purchased from Vigorous. Lysosome isolation kit (LYSISO1) was purchased from Sigma-Aldrich.

### **Cell culture and transfection**

NRK cells and L929 cells were cultured in DMEM medium (Hyclone) supplemented with 10% FBS (5% CO<sub>2</sub>). Cells were transfected with DNA using Vigofect. Cells were seeded in a 6-well plate at a density of  $6 \times 10^5$  per well and transfected with 100  $\mu$ l PBS that contained 2  $\mu$ l Vigofect (T001) and 2.5  $\mu$ g plasmid. The transfection mix was replaced with fresh medium after 4-6 hours.

### **Constructs**

The N-terminal mCherry-tagged Rat Tspan4 was cloned into the HindIII-AgeI sites of pmCherry-N1 plasmid using a Clone Express® II One Step Cloning Kit (Vazyme C112-02).

### **Live-cell imaging**

The night before imaging, cells were cultured in 35 mm glass-bottom dishes coated with fibronectin. Images were acquired using Nikon A1 and Olympus FV-1000 confocal microscopes.

### **Statistical analysis**

Two-tailed t-test was performed in GraphPad Prism. Data from 3 independent experiments were analyzed. Error bars in the figures represent the standard deviation (SD); n values are specified in the figure legends.
